# Supplementary material for: A Flexible Synthesis of 68Ga-Labeled Carbonic Anhydrase IX (CAIX)-Targeted Molecules via CBT/1,2-Aminothiol Click Reaction
Source: MDPI journal article supplement (doi:10.3390/molecules24010023), 2018-12-21
Supplement: s1 [file s1]

## Supporting Information for

### A Flexible Synthesis of <sup>68</sup>Ga-Labeled Carbonic Anhydrase IX (CAIX)-Targeted Molecules via CBT/1,2-Aminothiol Click Reaction

Kuo-Ting Chen <sup>a</sup>, Kevin Nguyen <sup>b</sup>, Christian Ieritano <sup>b</sup>, Feng Gao <sup>b</sup> and Yann Seimbille <sup>a,b</sup>

<sup>a</sup> Erasmus MC, University Medical Center Rotterdam, Department of Radiology and Nuclear Medicine, Wytemaweg 80, 3015 CN Rotterdam, The Netherlands. E-mail:

[y.seimbille@erasmusmc.nl](mailto:y.seimbille@erasmusmc.nl)

<sup>b</sup> TRIUMF, Life Sciences Division, 4004 Wesbrook Mall, Vancouver, V6T 2A3, British Columbia, Canada.

| Contents                                                                                                                                                                                        | Pages |
|-------------------------------------------------------------------------------------------------------------------------------------------------------------------------------------------------|-------|
| Figure S1. Radio-HPLC monitoring of the <sup>68</sup> Ga-labeling of <b>1</b> at different pH values.                                                                                           | 1     |
| Figure S2. Determination of the radiochemical purity and stability of [ <sup>68</sup> Ga]- <b>1</b> (A), [ <sup>68</sup> Ga]- <b>2</b> (B) and [ <sup>68</sup> Ga]- <b>3</b> (C) by radio-HPLC. | 2     |
| Figure S3. Identification of [ <sup>68</sup> Ga]- <b>L14b</b> .                                                                                                                                 | 4     |
| Figure S4. Radio-HPLC monitoring of the progress of click reaction between [ <sup>68</sup> Ga]- <b>1</b> and <b>8</b> .                                                                         | 5     |
| Figure S5. Radio-HPLC monitoring of the click reaction between <sup>68</sup> Ga-CBTs and AAZs.                                                                                                  | 6     |
| Figure S6. Determination of the stability of [ <sup>68</sup> Ga]- <b>L14-L16</b> in PBS by radio-HPLC.                                                                                          | 8     |
| Figure S7. Determination of the purity of <b>1</b> (A), <b>2</b> (B), <b>3</b> (C), <b>8</b> (D) and <b>9</b> (E) by HPLC.                                                                      | 9     |
| Figure S8. <sup>1</sup> H-NMR Spectra of compound <b>1</b> (400 MHz, CD <sub>3</sub> OD)                                                                                                        | 10    |
| Figure S9. <sup>1</sup> H-NMR Spectra of compound <b>2</b> (400 MHz, CD <sub>3</sub> OD).                                                                                                       | 11    |
| Figure S10. <sup>1</sup> H-NMR Spectra of compound <b>3</b> (400 MHz, CD <sub>3</sub> OD).                                                                                                      | 12    |
| Figure S11. <sup>1</sup> H-NMR Spectra of compound <b>5</b> (400 MHz, CDCl <sub>3</sub> ).                                                                                                      | 13    |
| Figure S12. <sup>1</sup> H-NMR Spectra of compound <b>6</b> (400 MHz, CDCl <sub>3</sub> ).                                                                                                      | 14    |
| Figure S13. <sup>1</sup> H-NMR Spectra of compound <b>8</b> (400 MHz, D <sub>2</sub> O).                                                                                                        | 15    |
| Figure S14. <sup>1</sup> H-NMR Spectra of compound <b>9</b> (400 MHz, D <sub>2</sub> O).                                                                                                        | 16    |
| Figure S15. <sup>1</sup> H-NMR Spectra of compound <b>13</b> (400 MHz, DMSO- <i>d</i> 6).                                                                                                       | 17    |

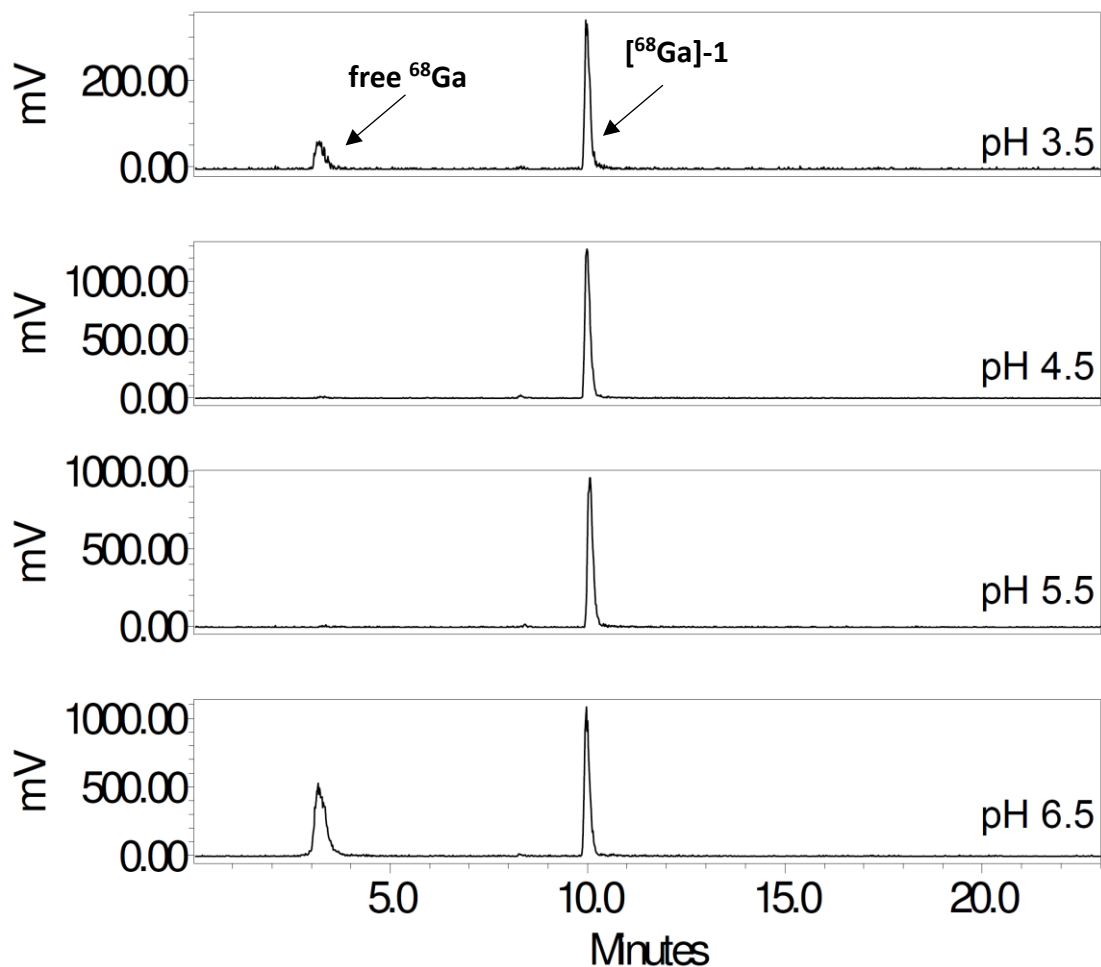

Figure S1. Radio-HPLC monitoring of the  $^{68}\text{Ga}$ -labeling of **1** at different pH values. The reaction was performed in sodium acetate buffer at 90 °C for 15 min with agitation (700 rpm). The RCYs were determined by radio-HPLC (system A). The retention time of free  $^{68}\text{Ga}$  and  $[^{68}\text{Ga}]\text{-1}$  were 3.3 and 10.0 min, respectively. The RCYs of the reactions at pH 3.5, 4.5, 5.5 and 6.5 were 78, 100, 100 and 51%, respectively.

(A) [<sup>68</sup>Ga]-1

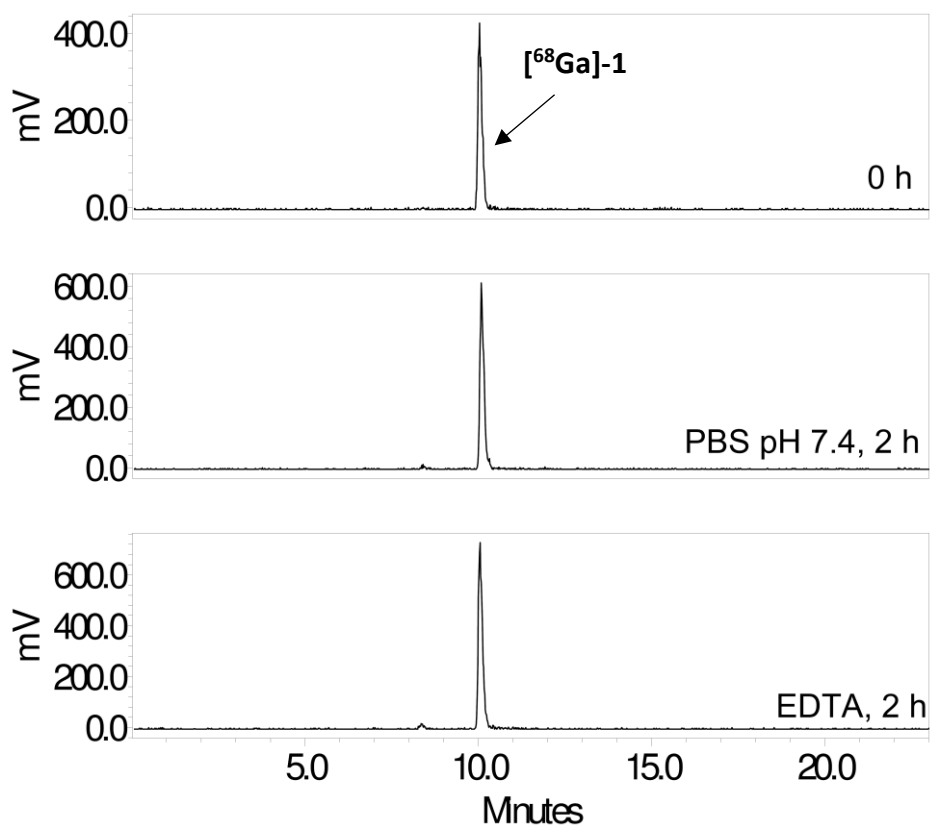

(B) [<sup>68</sup>Ga]-2

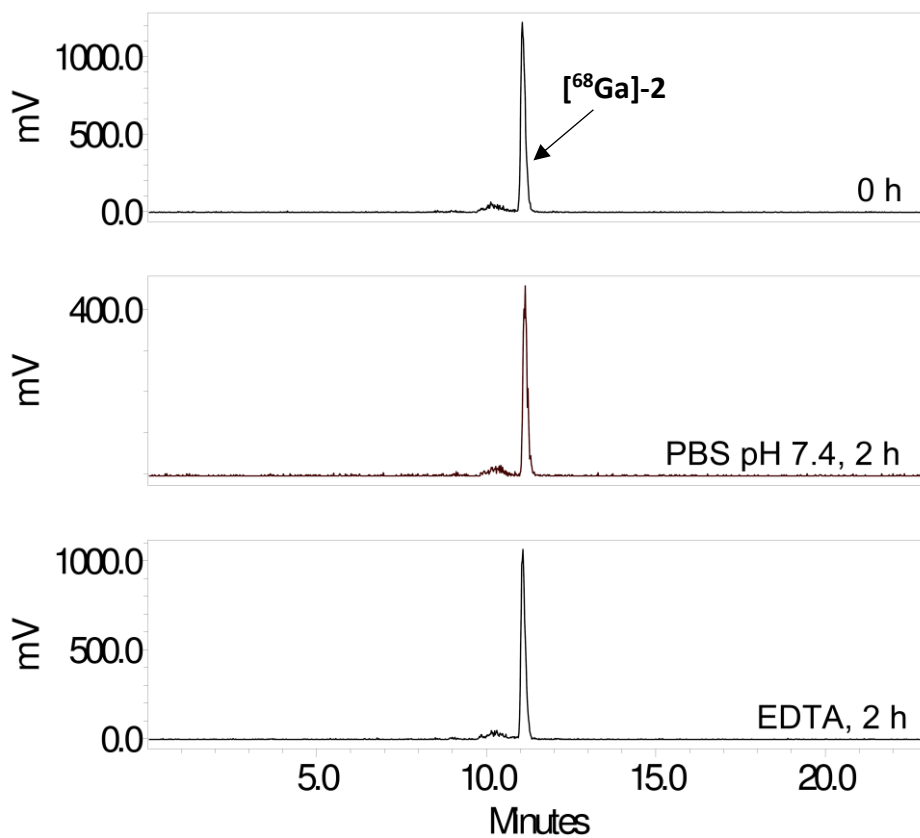

(C) [<sup>68</sup>Ga]-3

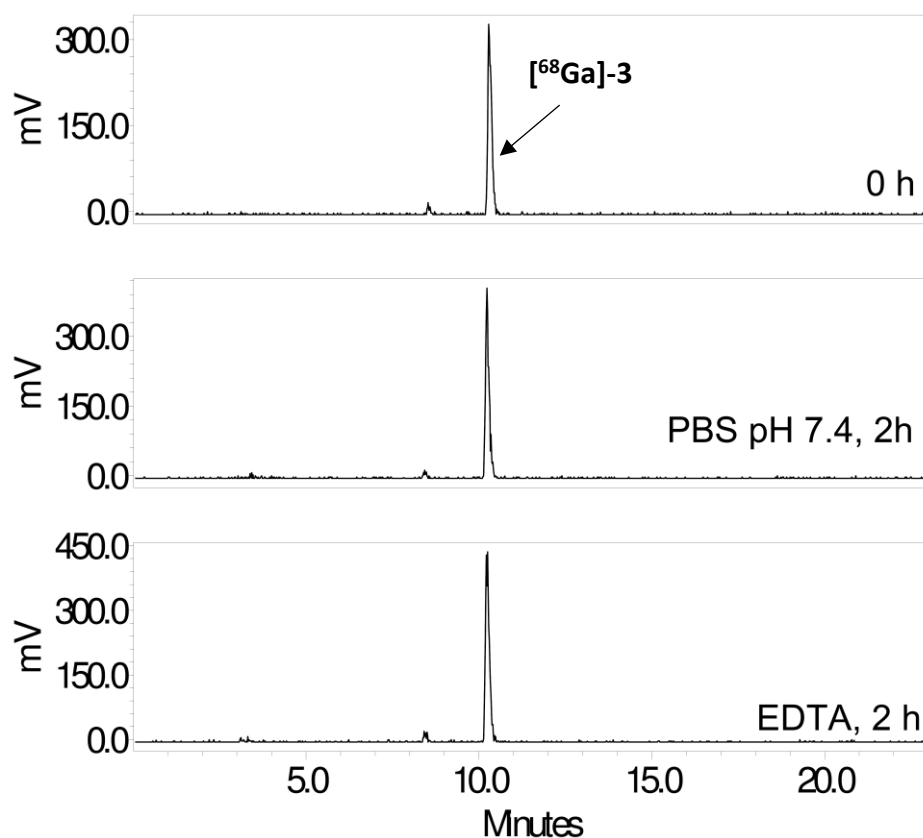

Figure S2. Determination of the radiochemical purity and stability of [<sup>68</sup>Ga]-1 (A), [<sup>68</sup>Ga]-2 (B) and [<sup>68</sup>Ga]-3 (C) by radio-HPLC (system A). The retention time of [<sup>68</sup>Ga]-1, [<sup>68</sup>Ga]-2 and [<sup>68</sup>Ga]-3 are 10.0, 11.1 and 10.2 min, respectively. The radiochemical purity of [<sup>68</sup>Ga]-1, 2 and 3 were all found to be higher than 98%. The [<sup>68</sup>Ga]-1, [<sup>68</sup>Ga]-2 and [<sup>68</sup>Ga]-3 remained intact after incubation in PBS (pH 7.4) and EDTA (34 mM) for 2 h.

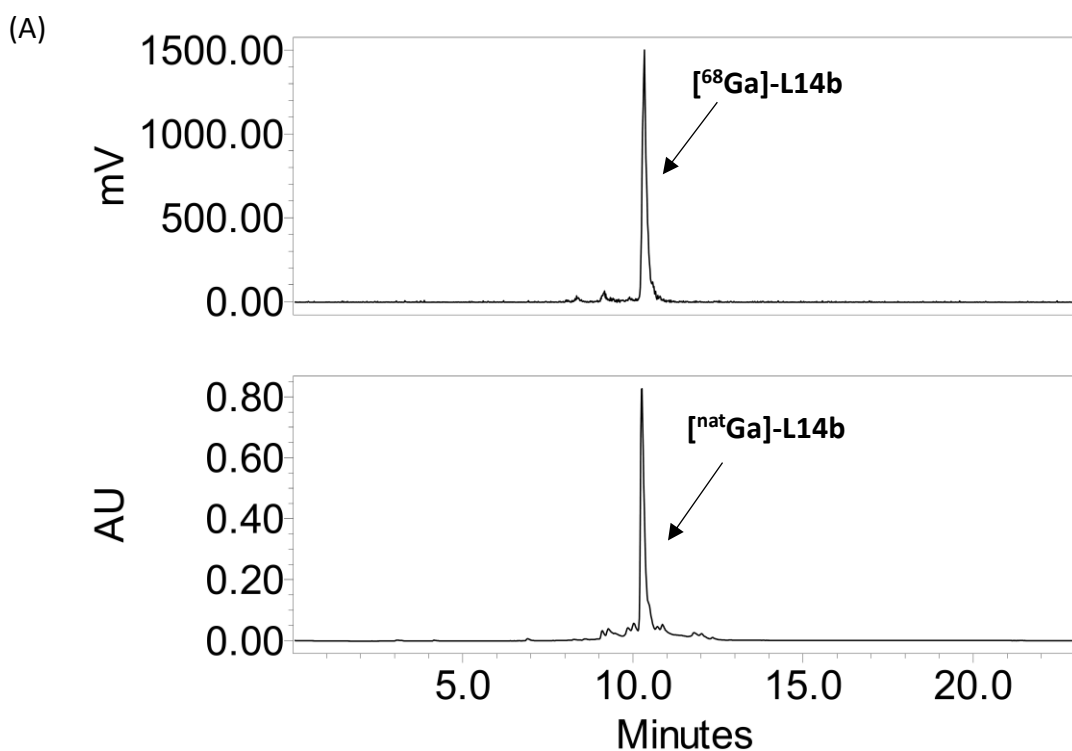

(B) GaNOPyXX\_180912100044 #3-10 RT: 0.08-0.22 AV: 3 NL: 3.52E7  
T: + p ESI Q1MS [300.000-2000.000]

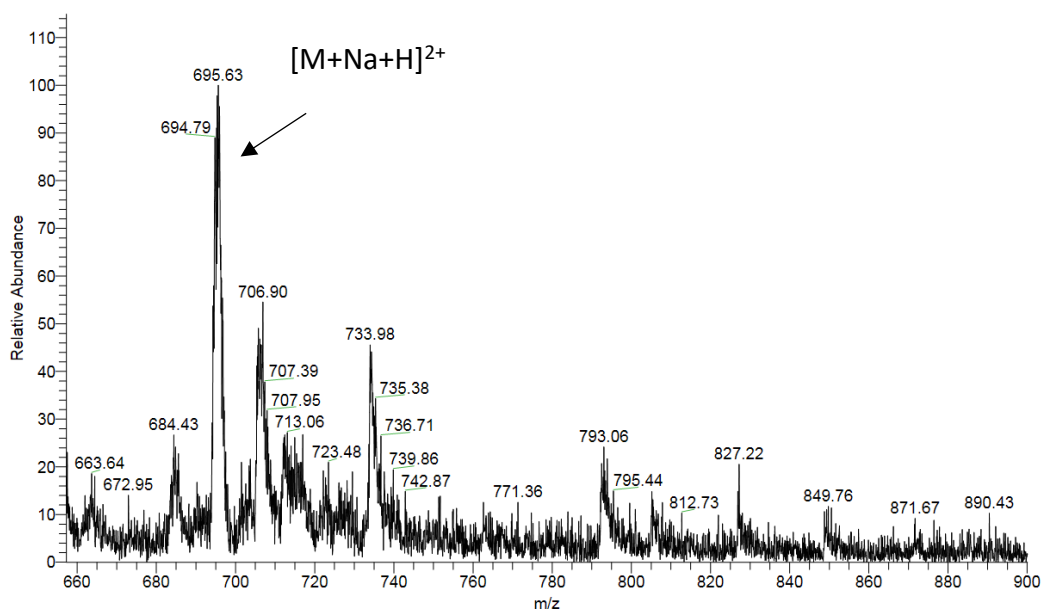

Figure S3. Identification of  $[^{68}\text{Ga}]\text{-L14b}$ . (A) Radio-chromatogram of  $[^{68}\text{Ga}]\text{-L14b}$  and UV absorbance at 350 nm of its corresponding non-radioactive analog  $[^{\text{nat}}\text{Ga}]\text{-L14b}$ . The  $[^{\text{nat}}\text{Ga}]\text{-L14b}$  was prepared following the similar protocol of the preparation of  $[^{68}\text{Ga}]\text{-L14b}$ . Briefly,  $[^{\text{nat}}\text{Ga}]\text{-1}$  (0.8 mg, 1.5  $\mu\text{mol}$ ) was labeled by  $\text{Ga}(\text{NO}_3)_3$  (1.5  $\mu\text{mol}$ ) in a  $\text{NaOAc}$  buffer (pH 5.5, 90  $^\circ\text{C}$ , 15 min), and followed by conjugation with **9** (2 mg, 1.5  $\mu\text{mol}$ ) in PBS buffer (pH 9.0, 37  $^\circ\text{C}$ , 1 h) to give  $[^{\text{nat}}\text{Ga}]\text{-L14b}$ . The retention time of  $[^{68}\text{Ga}]\text{-L14b}$  and  $[^{\text{nat}}\text{Ga}]\text{-L14b}$  were 10.3 and 10.3 min, respectively. (B) Mass spectrum of  $[^{\text{nat}}\text{Ga}]\text{-L14b}$ . ESI-MS:  $m/z$  695.6  $[\text{M} + \text{Na} + \text{H}]^{2+}$ .

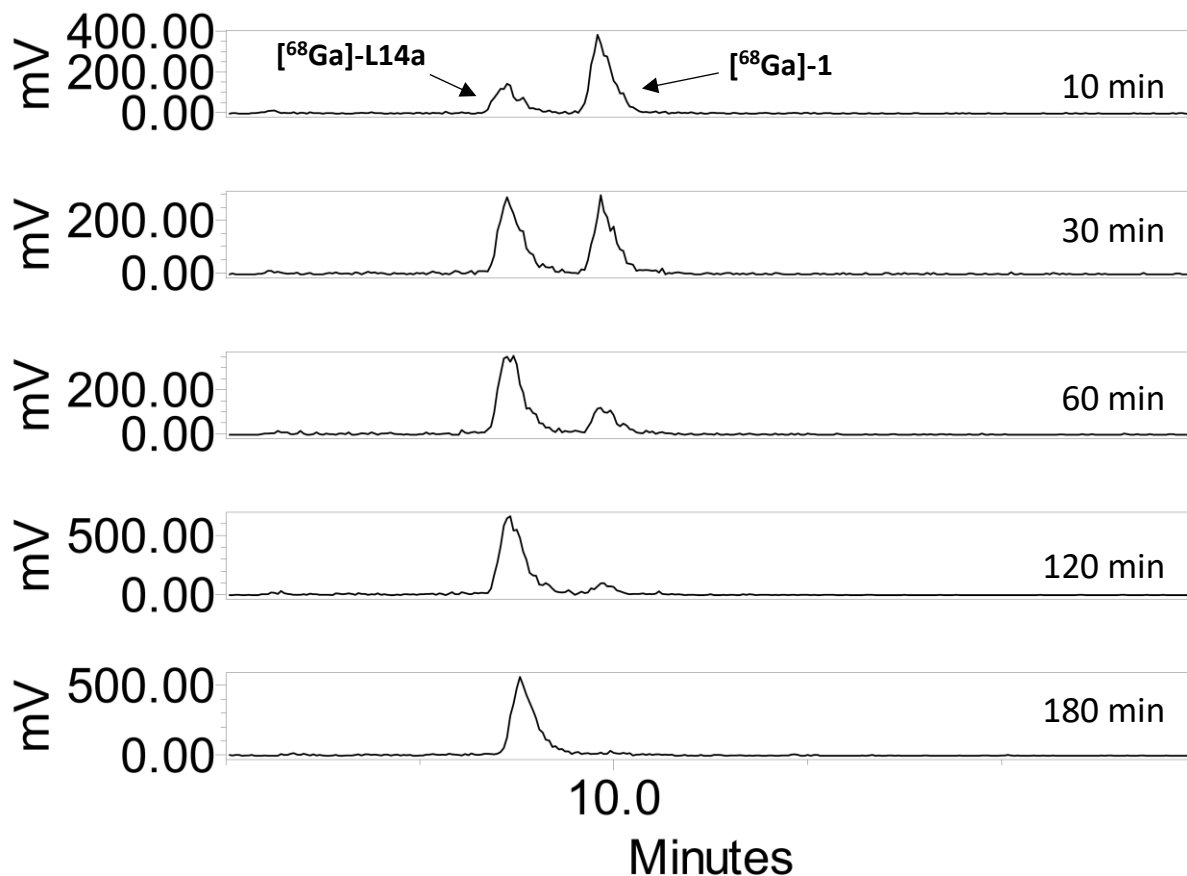

Figure S4. Radio-HPLC monitoring of the progress of click reaction between  $[^{68}\text{Ga}]\text{-1}$  and **8**. Conversion of  $[^{68}\text{Ga}]\text{-1}$  (retention time = 10.0 min) into the corresponding  $[^{68}\text{Ga}]\text{-L14a}$  (retention time = 9.4 min) by treatment with **8** (10 nM) at 37 °C in PBS (pH 7.4) with agitation (700 rpm). The reactions were quenched by the addition of 10% AcOH and analyzed by analytic radio-HPLC at 10, 30, 60, 120 and 180 min.

(A)

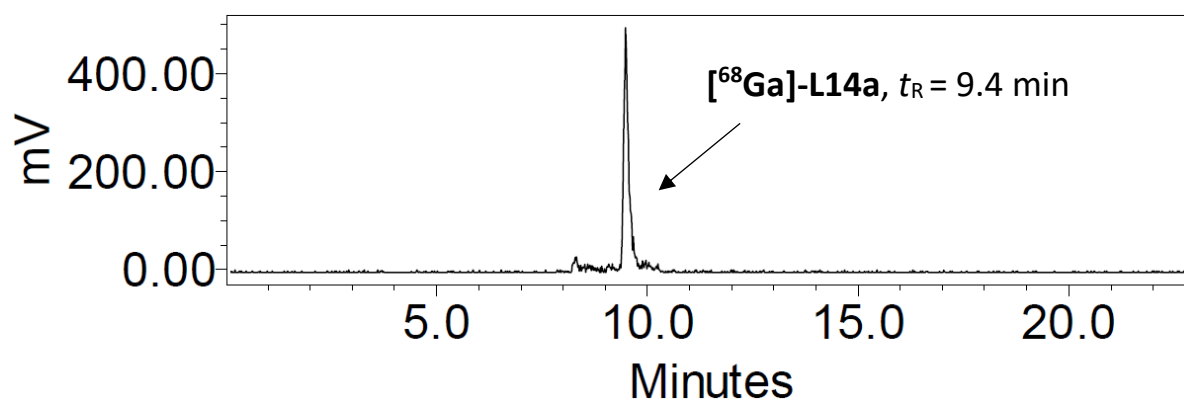

(B)

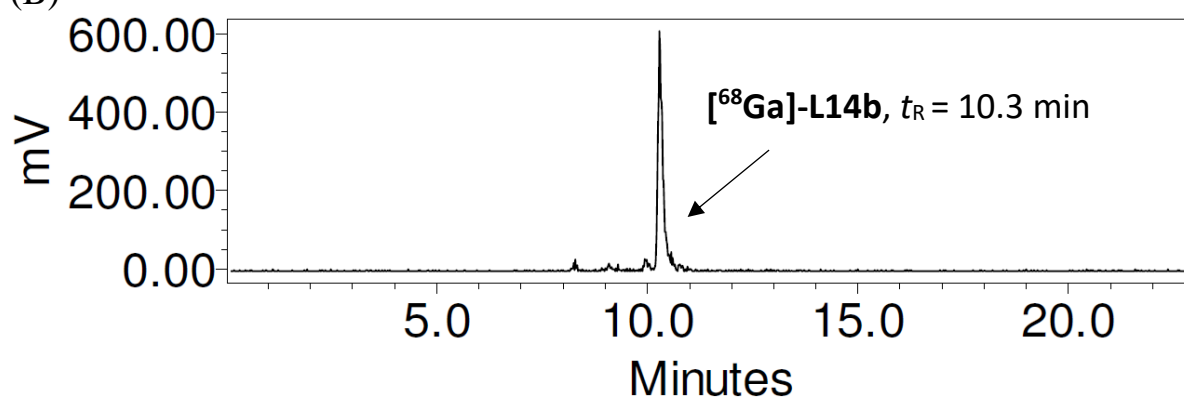

(C)

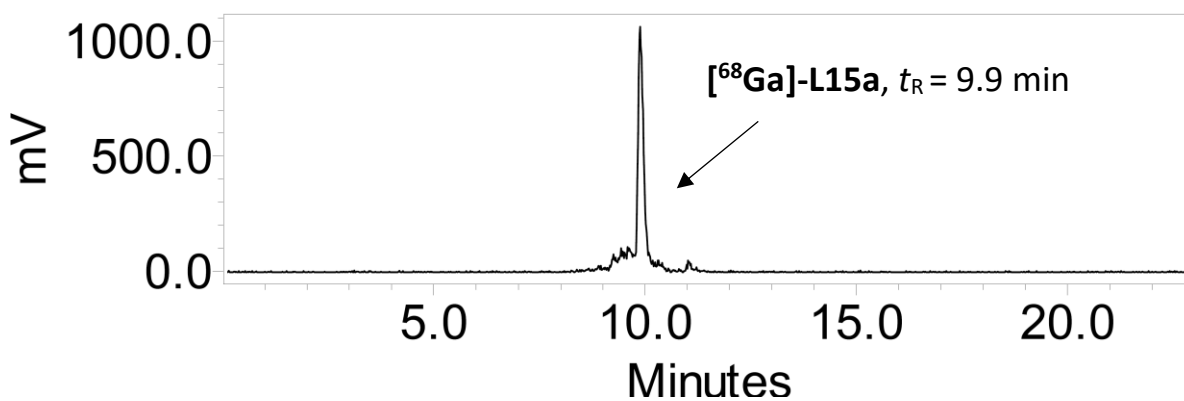

(D)

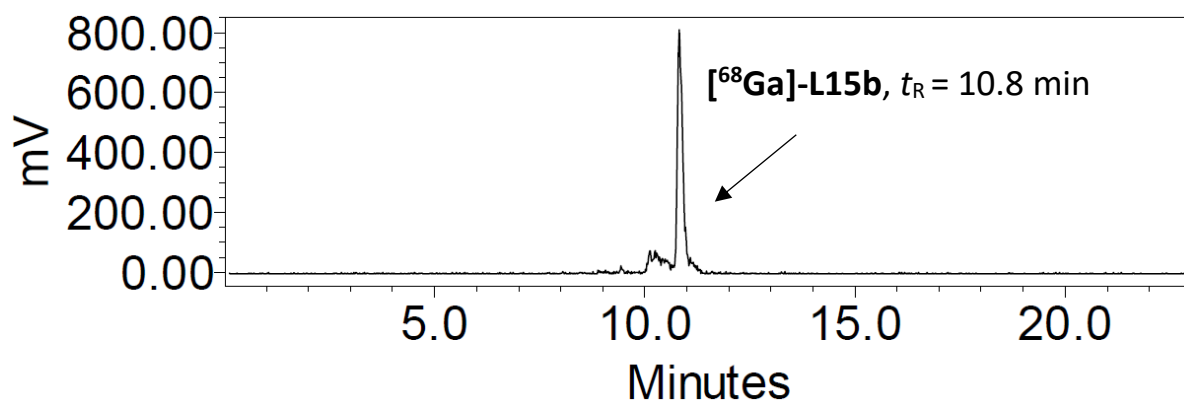

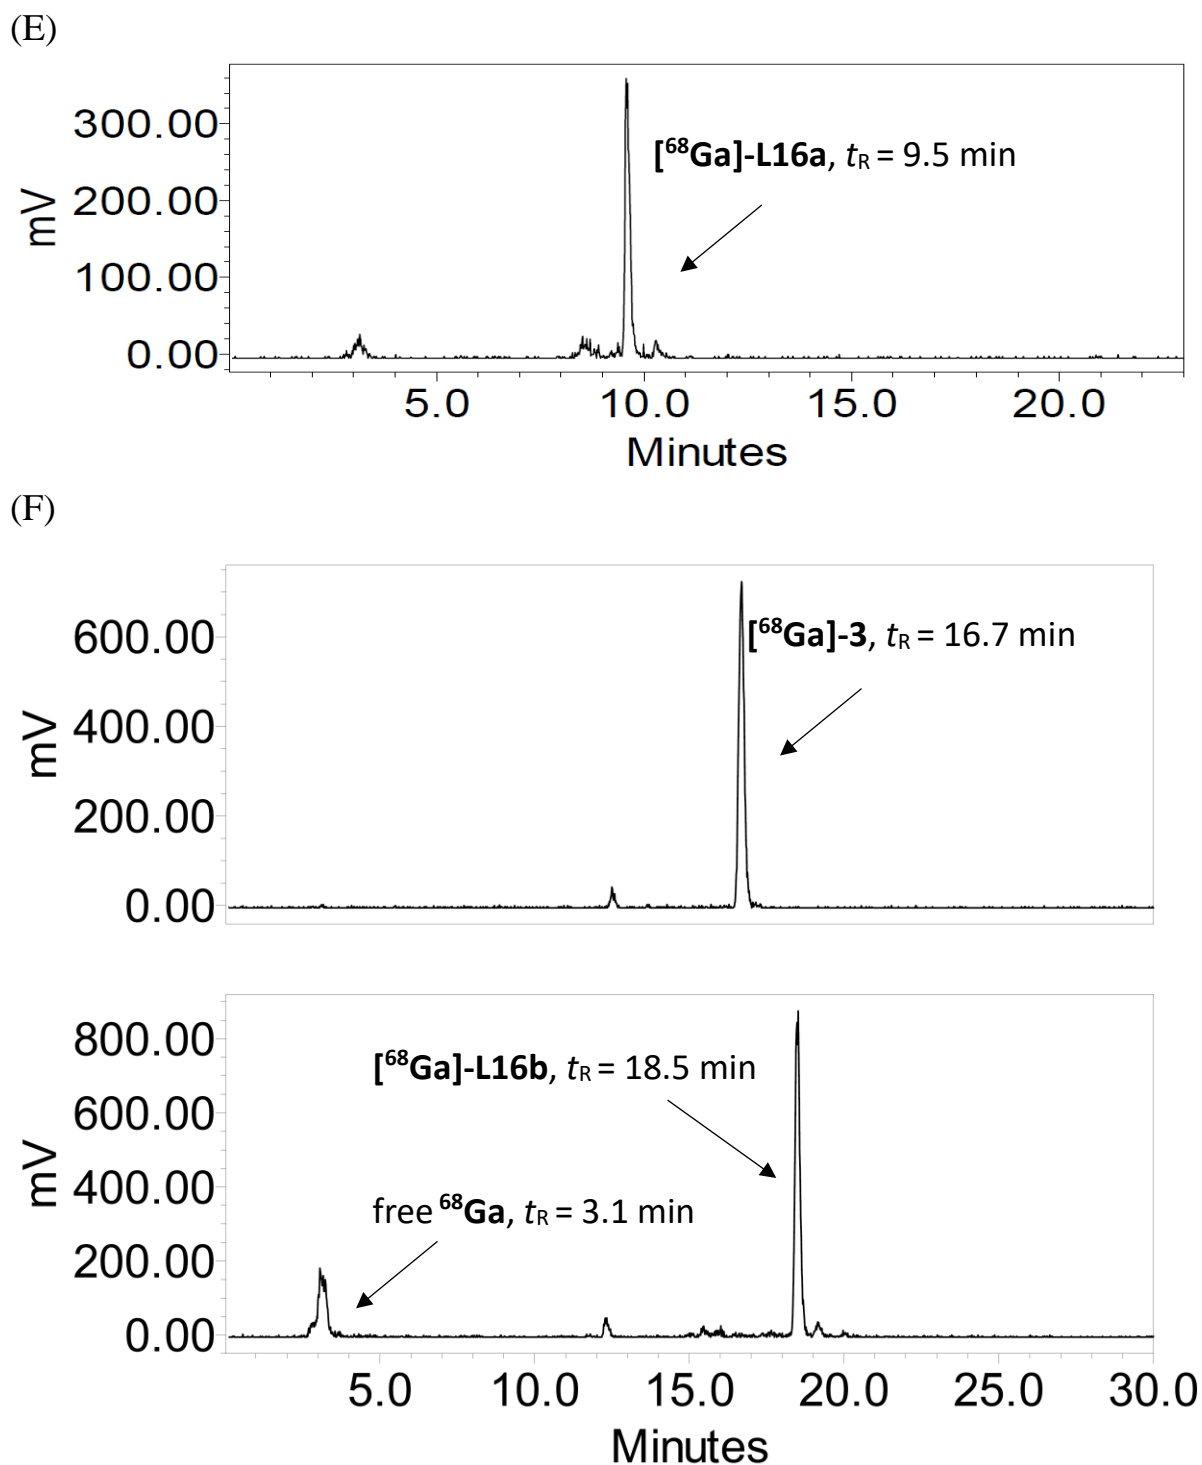

Figure S5. Radio-HPLC monitoring of the click reaction between  $[^{68}\text{Ga}]$ -CBTs and AAZs. Syntheses of  $[^{68}\text{Ga}]$ -L14a (A),  $[^{68}\text{Ga}]$ -L14b (B),  $[^{68}\text{Ga}]$ -L15a (C),  $[^{68}\text{Ga}]$ -L15b (D) and  $[^{68}\text{Ga}]$ -L16a (E) were analyzed by HPLC system A. The preparation of  $[^{68}\text{Ga}]$ -L16b (F: bottom) was analyzed by HPLC system B. The retention time of the precursor  $[^{68}\text{Ga}]$ -3 (F: top) was indicated as 16.7 min in this system.



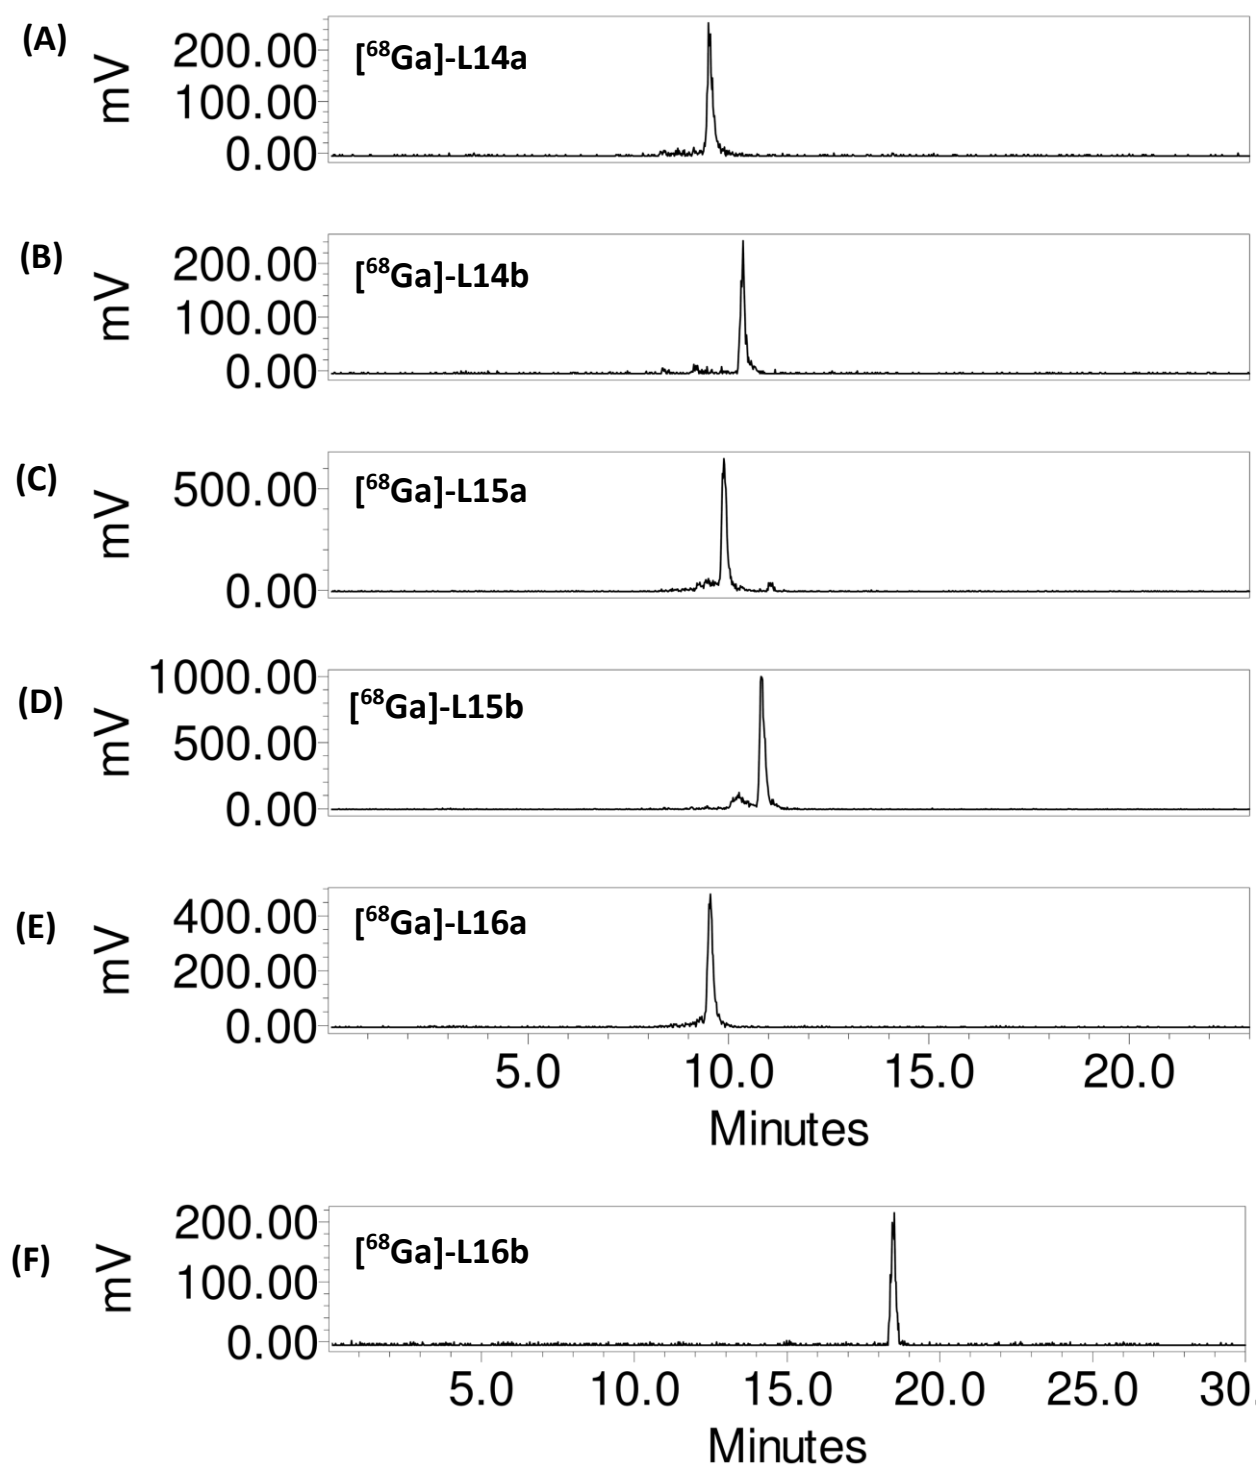

Figure S6. Determination of the stability of [<sup>68</sup>Ga]-L14-L16 in PBS by radio-HPLC. The stability of [<sup>68</sup>Ga]-L14a (A), [<sup>68</sup>Ga]-L14b (B), [<sup>68</sup>Ga]-L15a (C), [<sup>68</sup>Ga]-L15b (D) and [<sup>68</sup>Ga]-L16a (E) were analyzed by HPLC system A, and [<sup>68</sup>Ga]-L16b (F) was analyzed by HPLC system B. [<sup>68</sup>Ga]-L16a and [<sup>68</sup>Ga]-L16b were purified by HPLC to remove free <sup>68</sup>Ga before stability testing. All the compounds were stable after incubation in PBS (pH 7.4) for 2 h, and no radiolysis were observed.

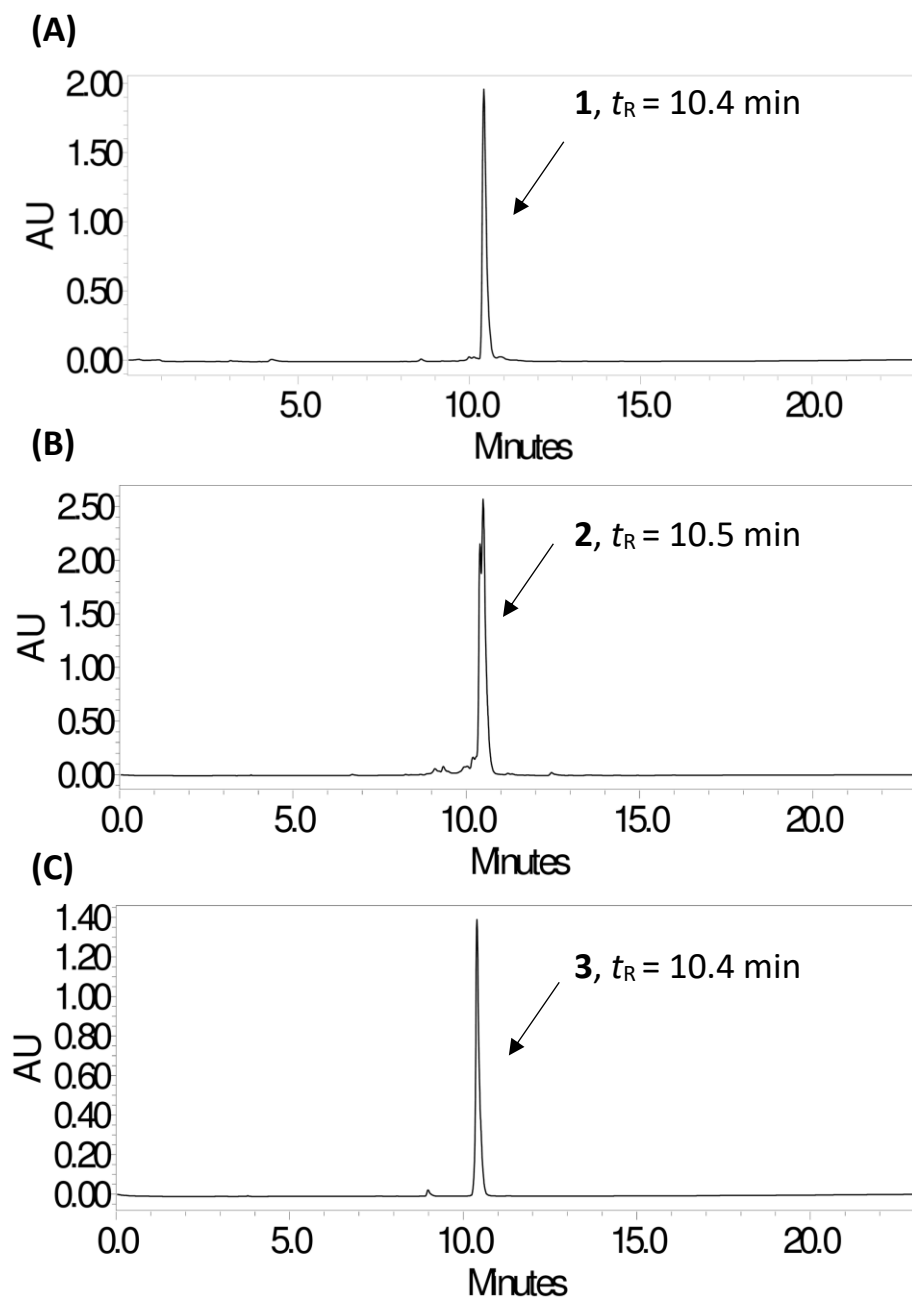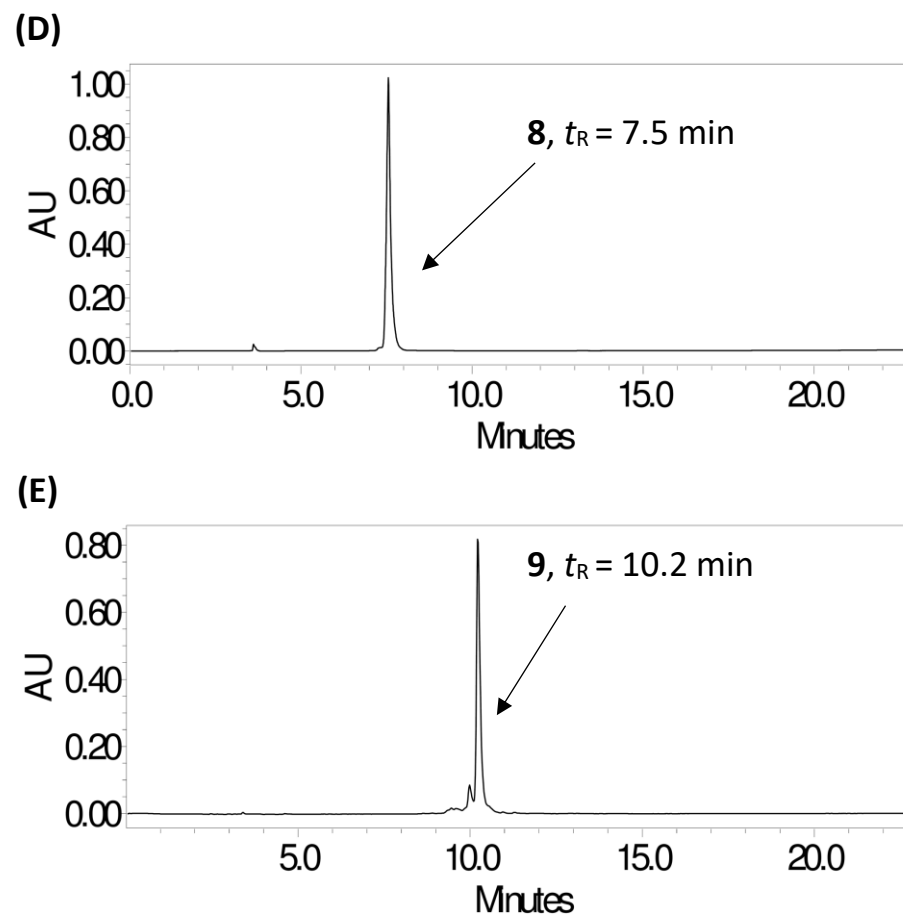

Figure S7. Determination of the purity of **1** (A), **2** (B), **3** (C), **8** (D) and **9** (E) by HPLC (system A, UV detector at 254 nm). The retention time of **1**, **2**, **3**, **8** and **9** are 10.4, 10.5, 10.4, 7.5 and 10.2 min, respectively. The purity of **1**, **2**, **3**, **8** and **9** were all found to be higher than 95%.

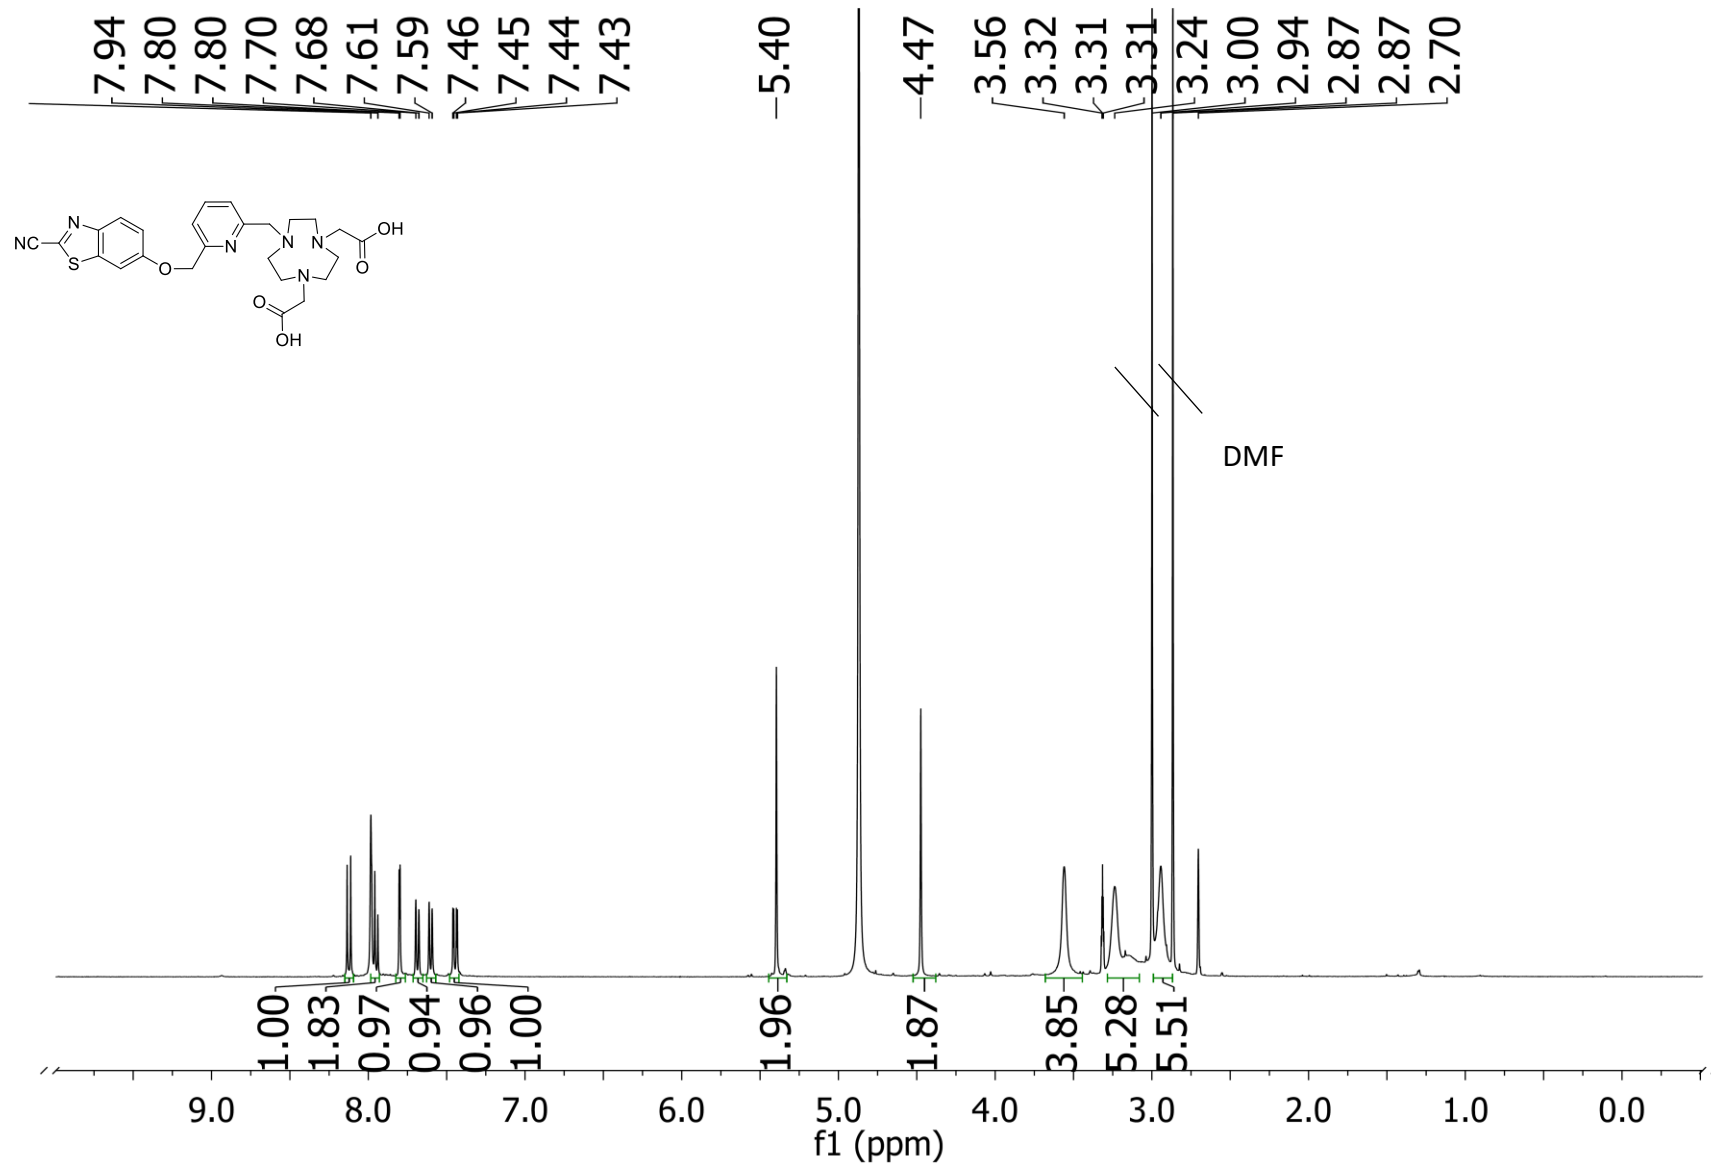

Figure S8. <sup>1</sup>H-NMR Spectra of compound 1 (400 MHz, CD<sub>3</sub>OD)

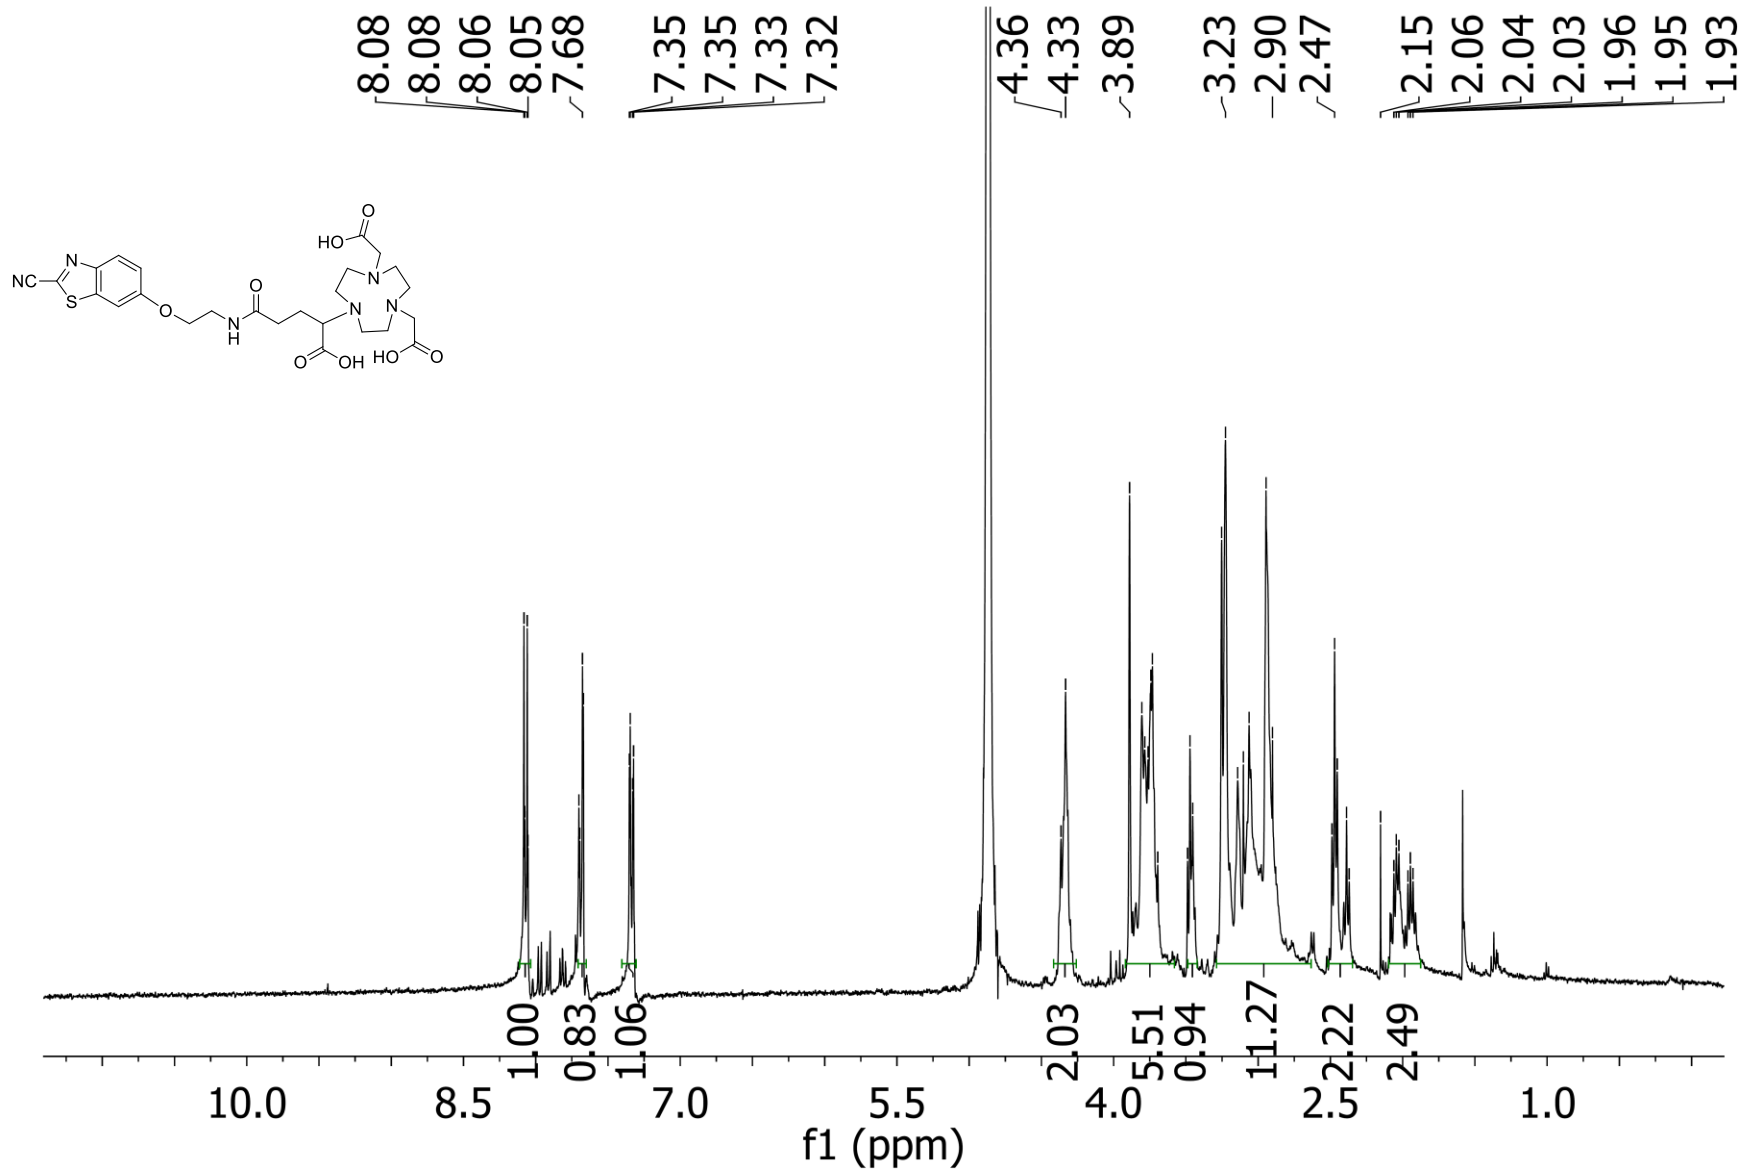

Figure S9. <sup>1</sup>H-NMR Spectra of compound **2** (400 MHz, CD<sub>3</sub>OD).

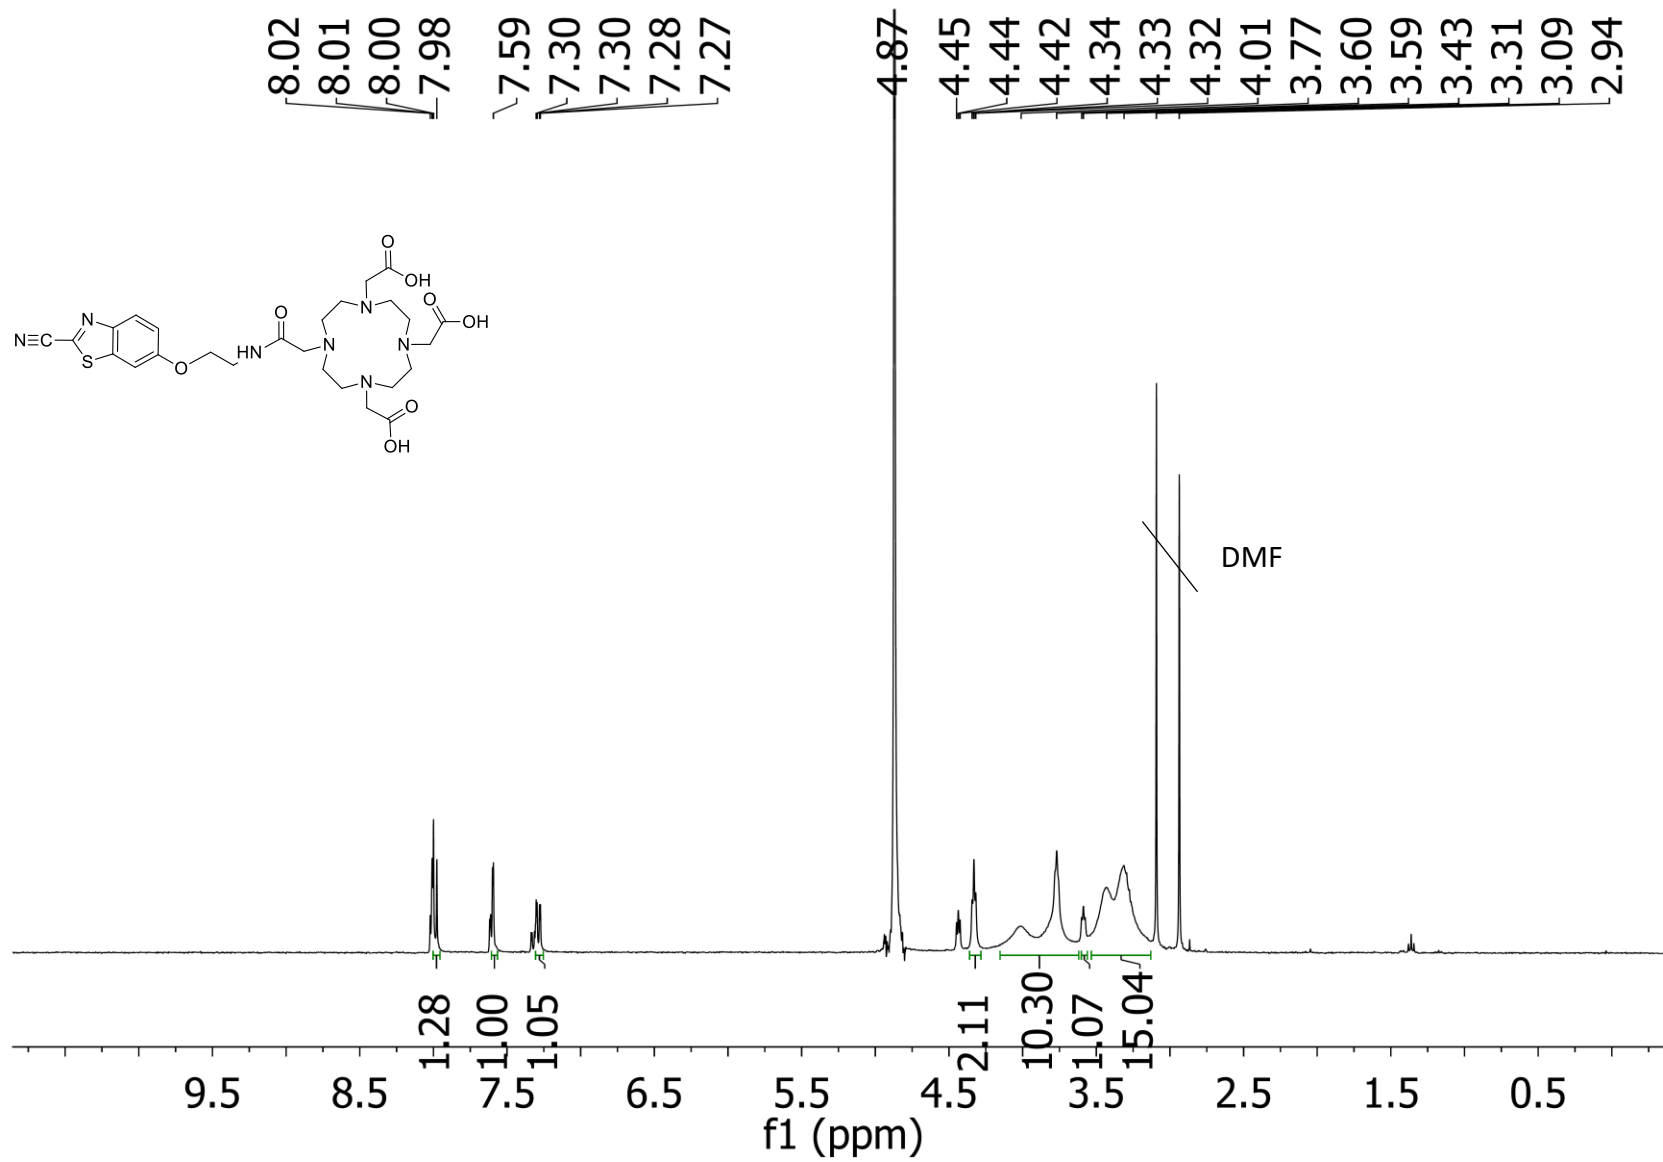

Figure S10. <sup>1</sup>H-NMR Spectra of compound **3** (400 MHz, CD<sub>3</sub>OD).

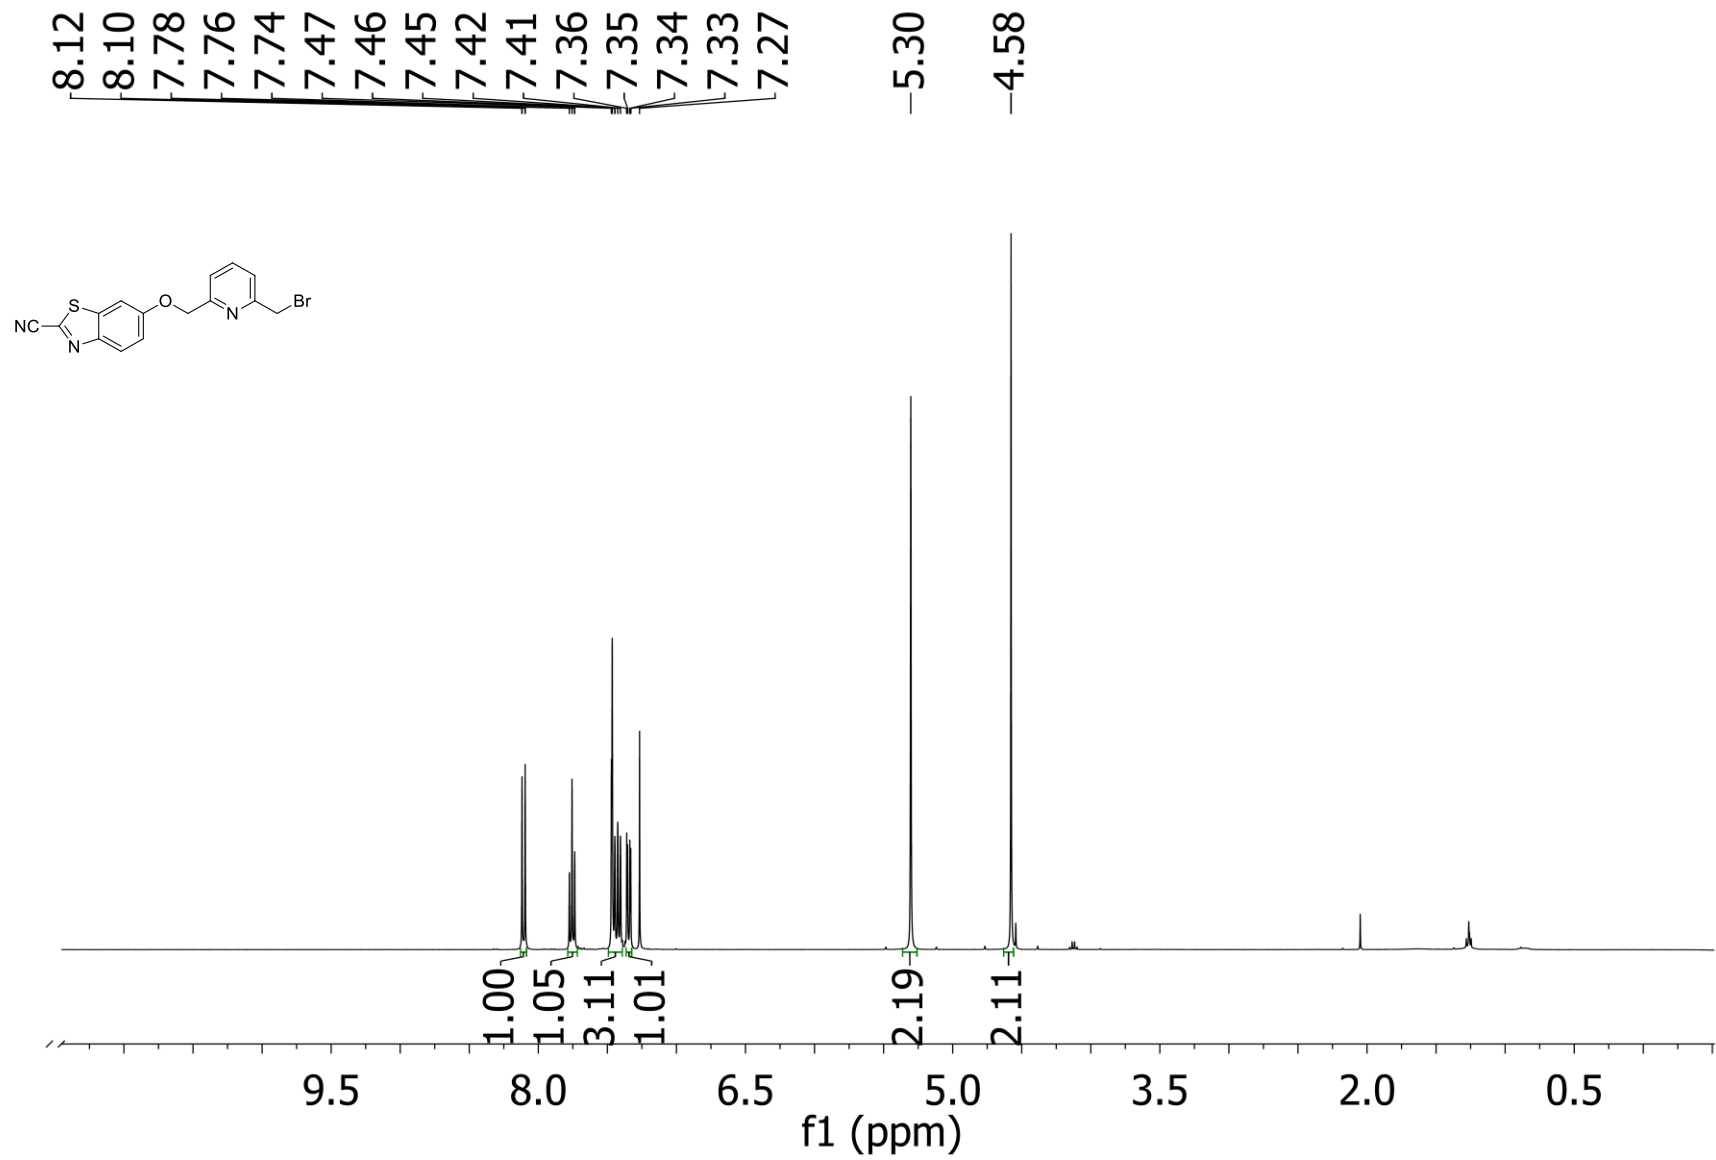

Figure S11. <sup>1</sup>H-NMR Spectra of compound 5 (400 MHz, CDCl<sub>3</sub>).

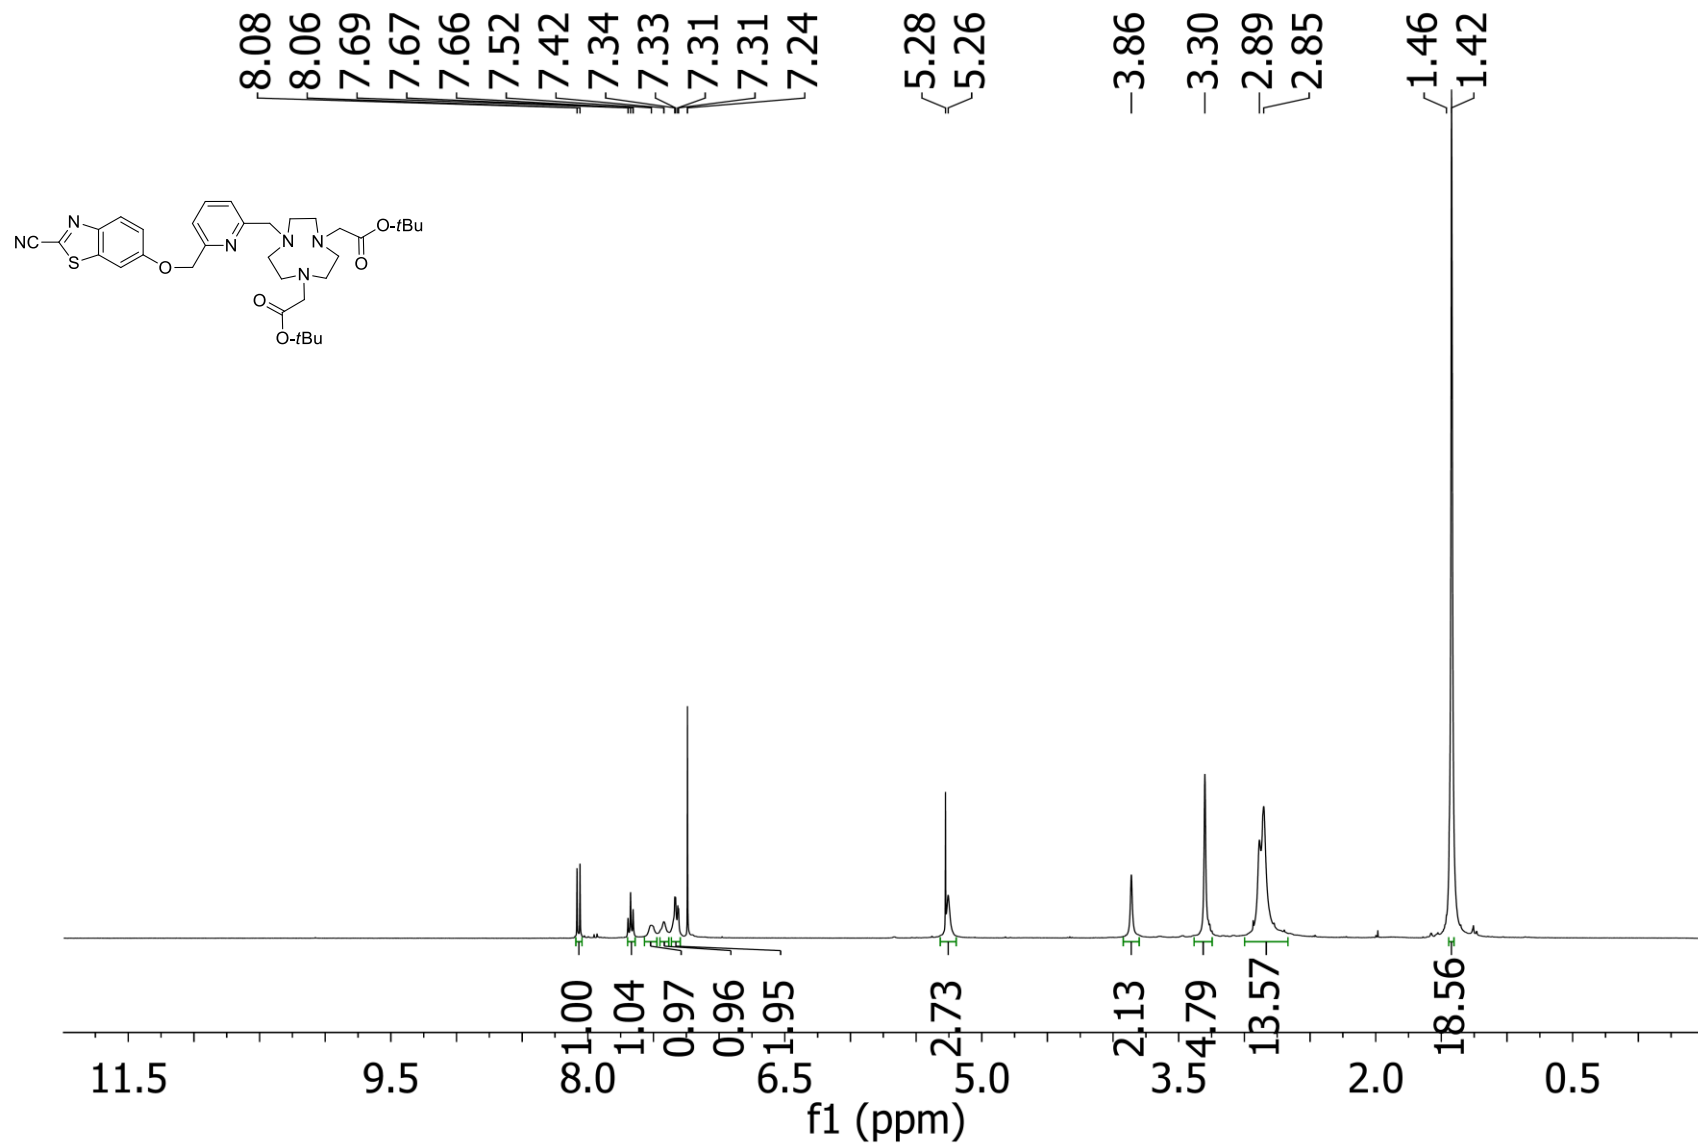

Figure S12. <sup>1</sup>H-NMR Spectra of compound **6** (400 MHz, CDCl<sub>3</sub>).

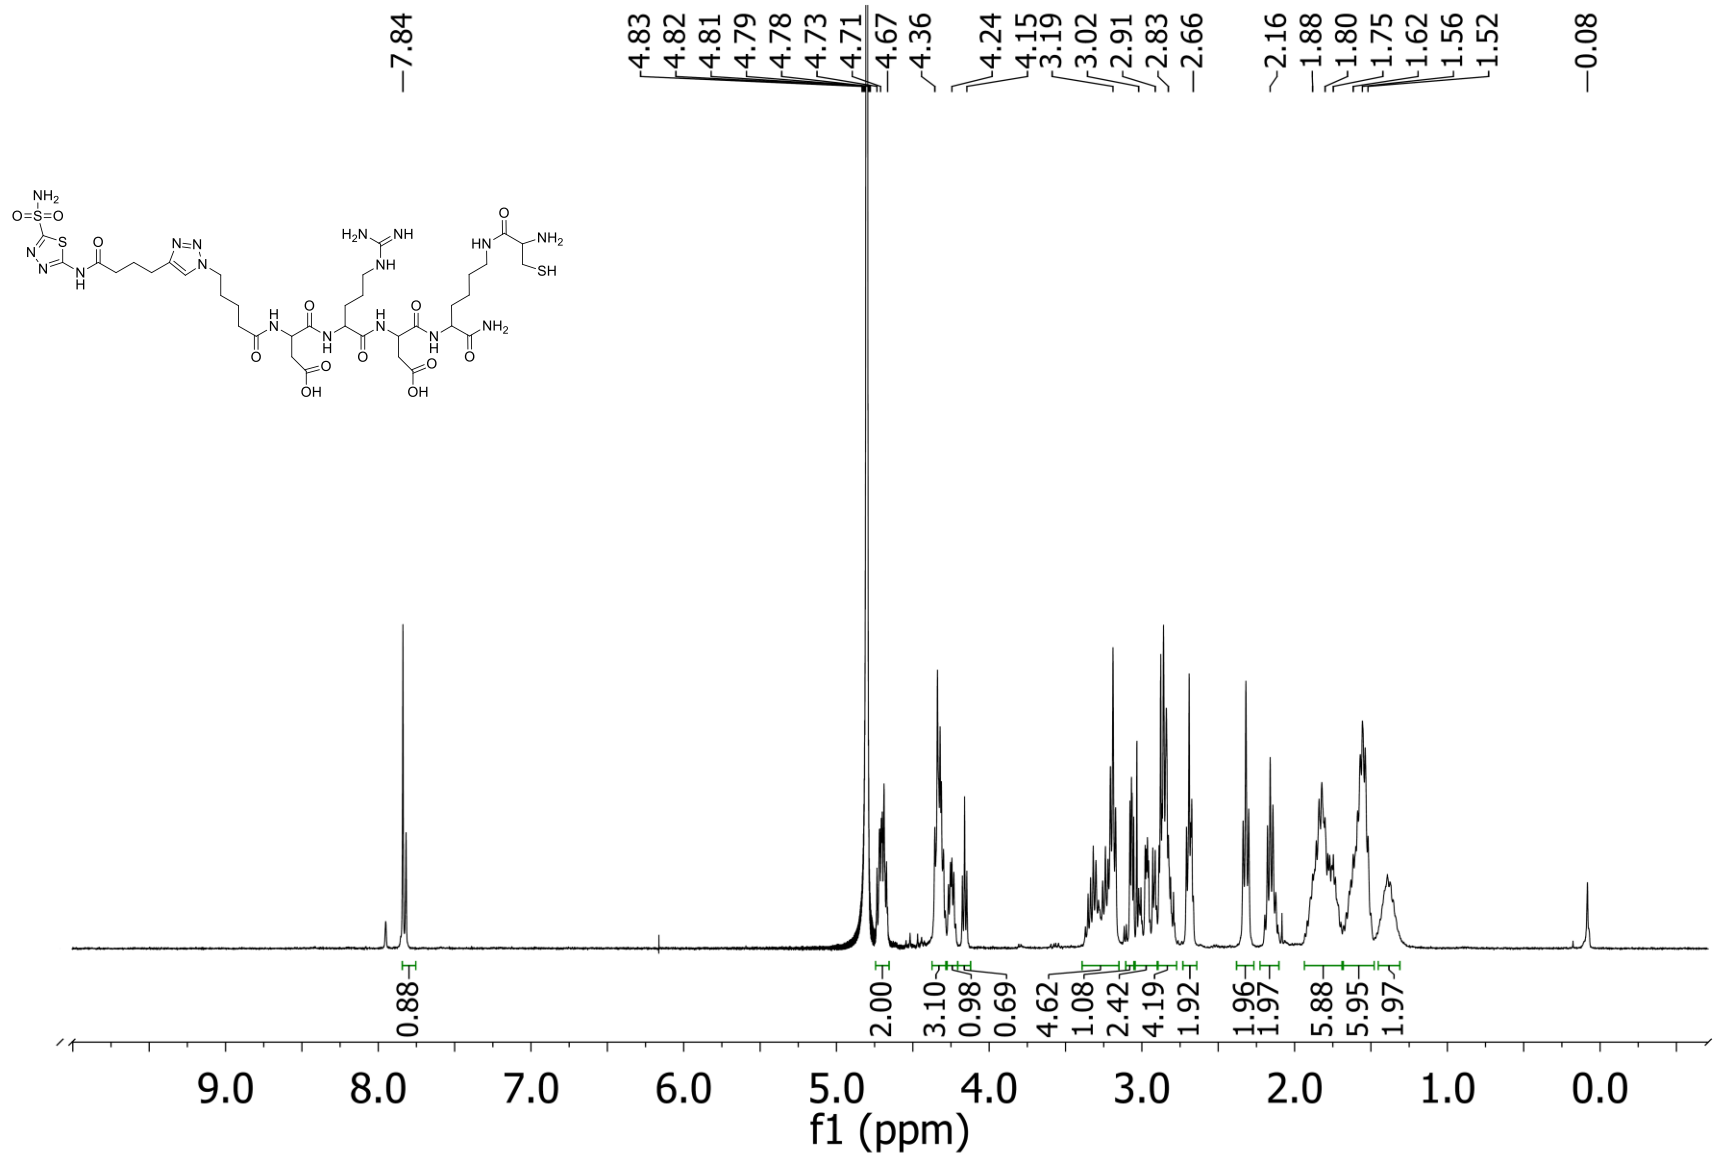

Figure S13. <sup>1</sup>H-NMR Spectra of compound **8** (400 MHz, D<sub>2</sub>O).



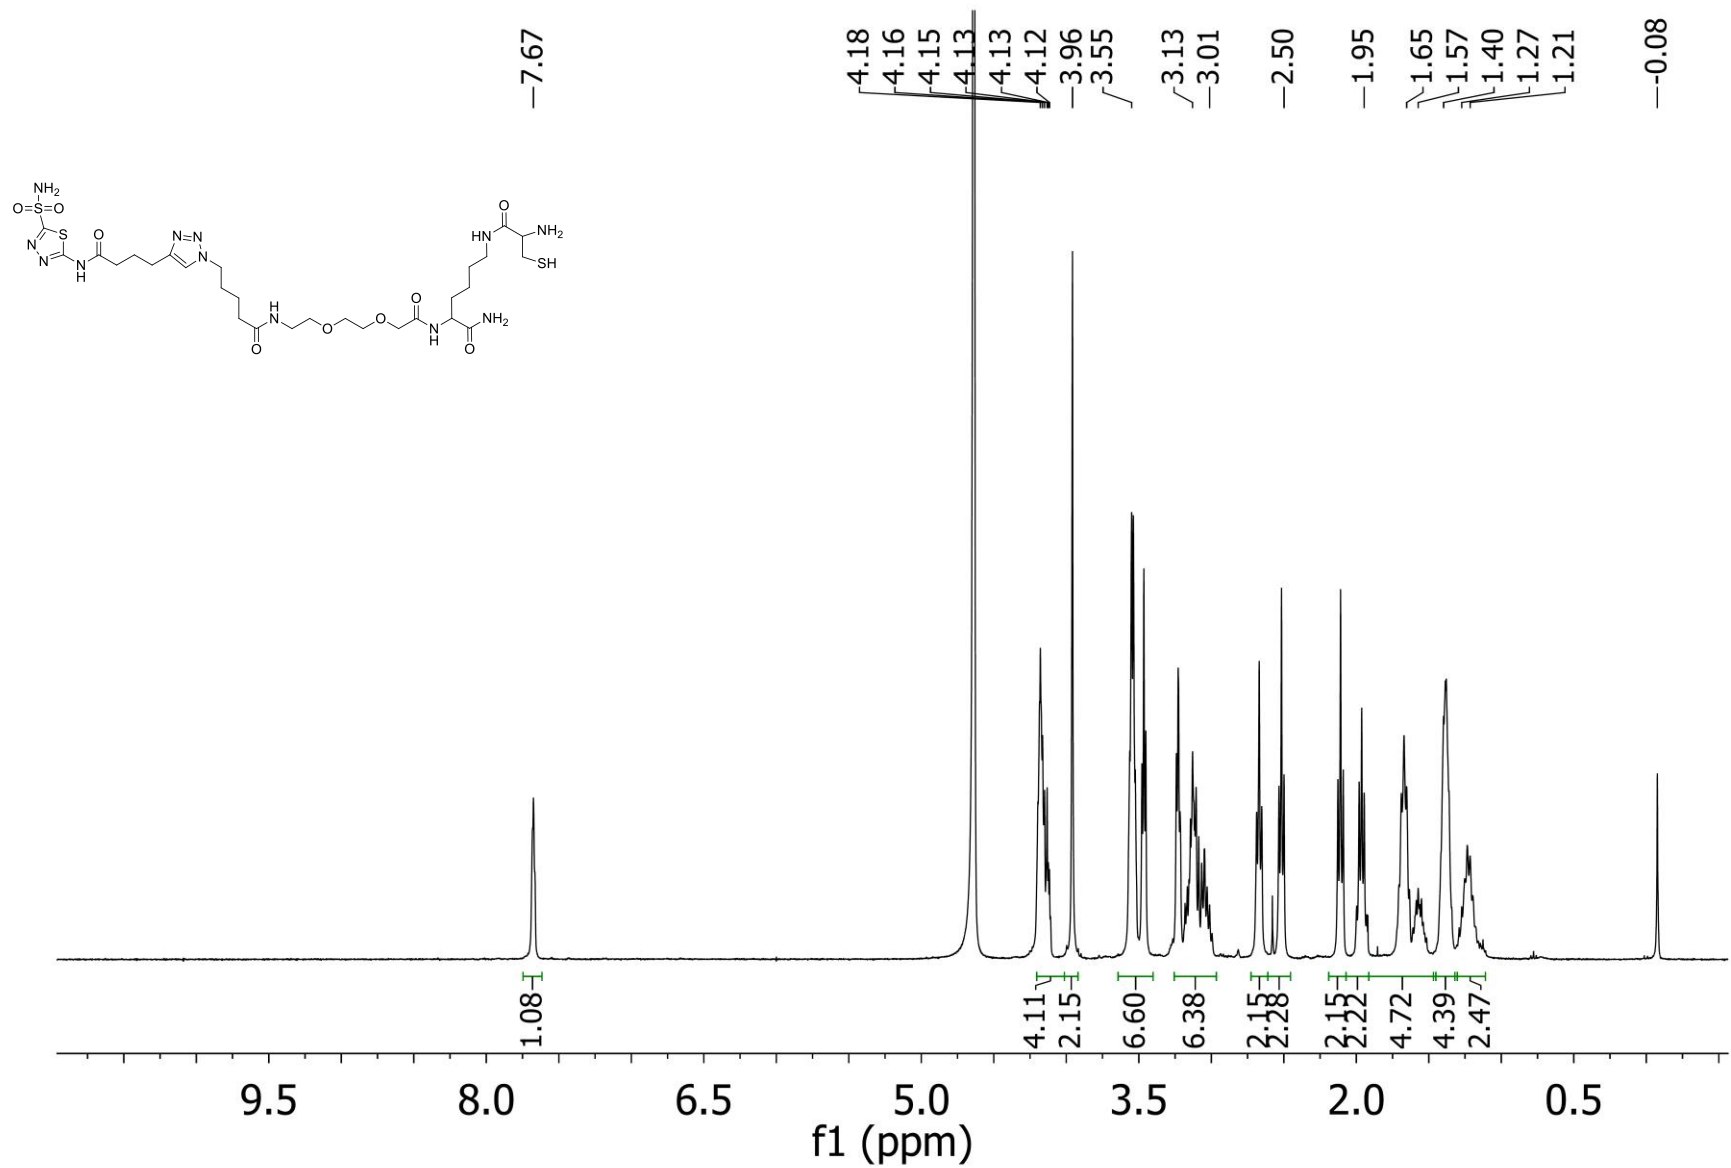

Figure S14. <sup>1</sup>H-NMR Spectra of compound 9 (400 MHz, D<sub>2</sub>O).

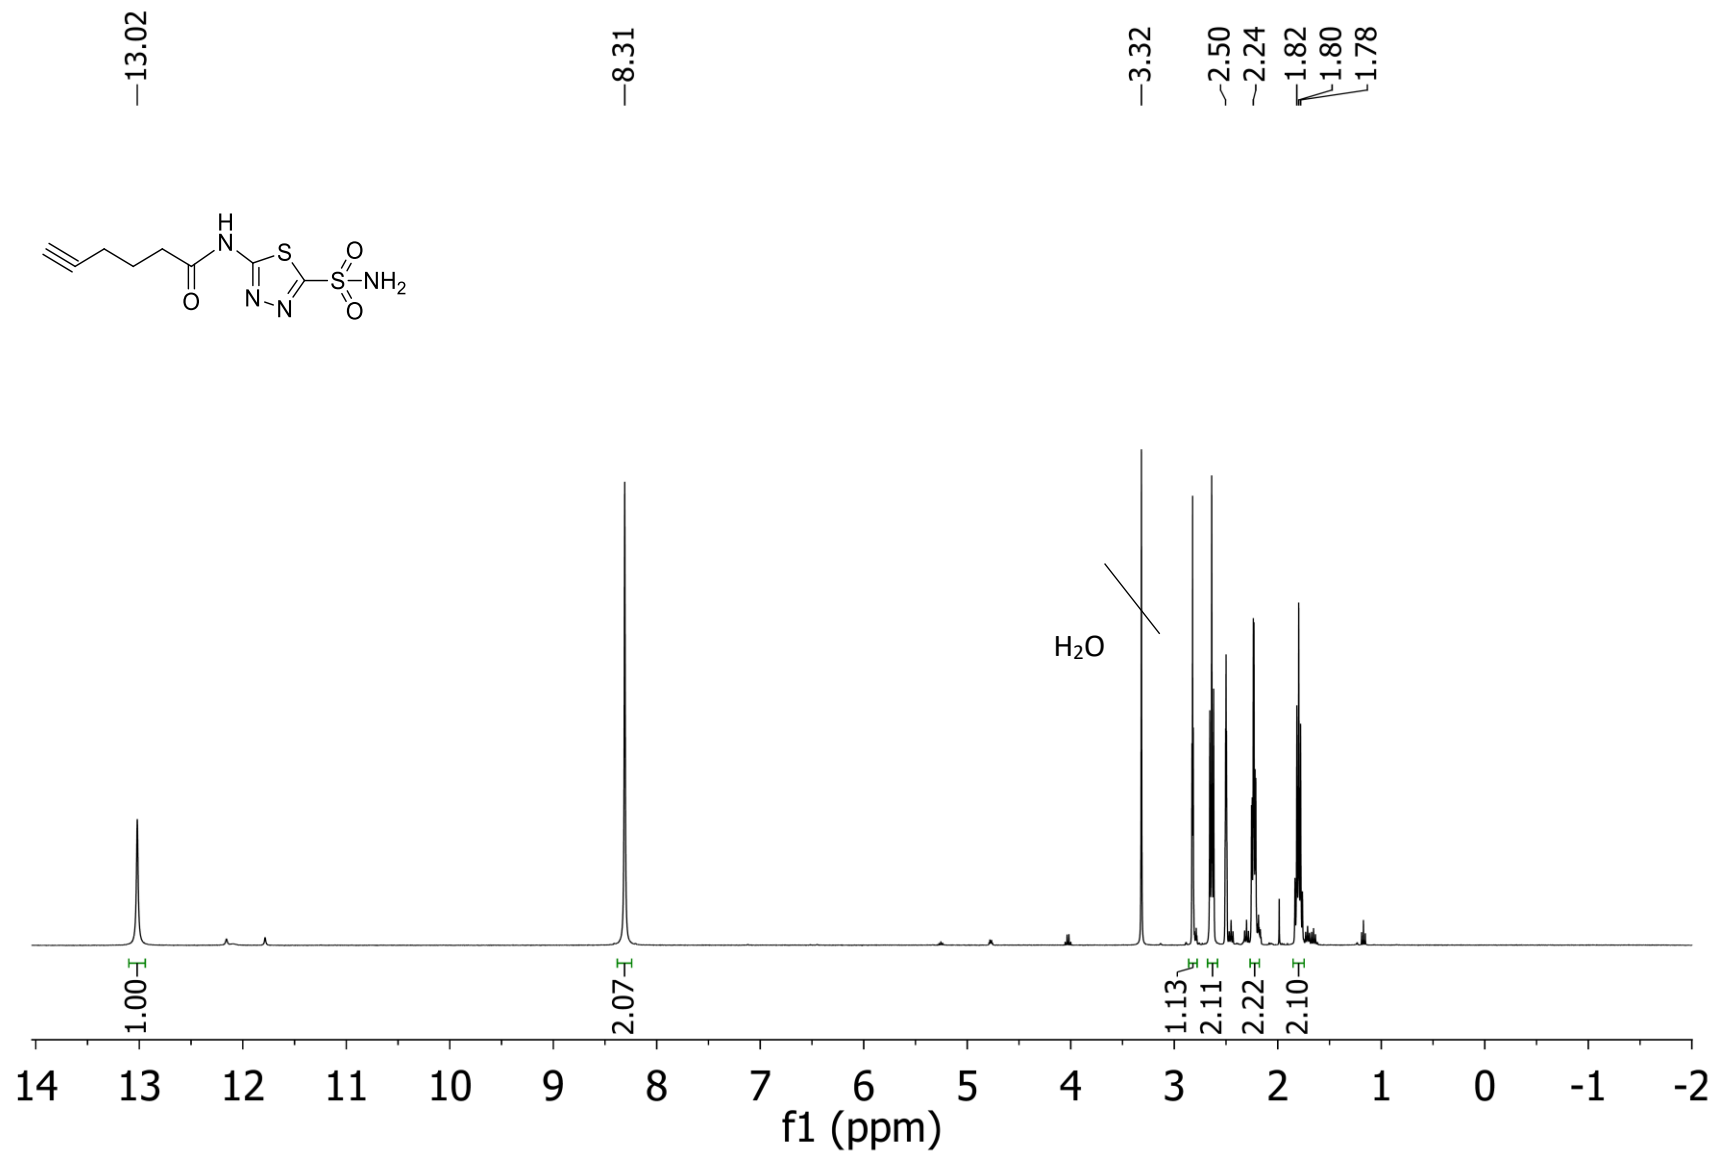

Figure S15. <sup>1</sup>H-NMR Spectra of compound **13** (400 MHz, DMSO-*d*<sub>6</sub>).
